# Supplementary material for: Obesity, Diabetes, and Cardiovascular Risk Burden in Systemic Lupus Erythematosus: Current Approaches and Knowledge Gaps—A Rapid Scoping Review
Source: MDPI journal article supplement (doi:10.3390/ijerph192214768), 2022-11-10
Supplement: s1 [file s1]

## Abbreviations

ABI: Ankle Brachial Index  
ADA: American Diabetes Association  
Alx: Augmentation index  
AoS: Aortic stiffness  
APS: Antiphospholipid syndrome  
ASCVD-ACC/AHA: Pooled Cohort Risk Equations-American College of Cardiology/American Heart Association  
BILAG: British Isles Lupus Assessment Group  
BMD: Bone mineral density  
CEC: Cholesterol Efflux Capacity  
CES-D: Center for Epidemiological Studies-Depression  
cIMT: Carotid intima-media thickness  
CVD: Cardiovascular disease  
ESRD: End-stage renal disease  
FACIT-F: Functional Assessment of Chronic Illness Therapy – Fatigue  
FMD: Flow-mediated dilation  
FRS: Framingham Risk Score  
GlycA: Glycoprotein acetylation  
HOMA-IR: Homeostatic Model Assessment of Insulin Resistance  
HRQOL-SF 36: Health-related quality of life -The Short Form-36 Health Survey  
hs-CRP: High sensitive C-reactive protein  
ICD-10: International Classification of Diseases 10th Revision.  
IDL: Intermediate density lipoproteins  
IL-6: Interleukin-6  
LAP: Lipid accumulation product  
LDL: low-density lipoprotein  
Med Diet: Mediterranean diet

MEX-SLEDAI: Mexican Systemic Lupus Erythematosus Disease Activity Index  
MFR: Myocardial flow reserve  
mFRS: Modified Framingham Risk Score  
MMP-1: Collagenase-1  
MMP-7: Matrilysin  
mSCORE: Modified Systematic Coronary Risk Evaluation  
NETs: Neutrophil extracellular traps  
NICE: National Institute for Health and Care Excellence  
NLR: Neutrophil-to-lymphocyte ratio  
N/S: Not stated  
PGA: Physician Global Assessment score  
PON1: Serum paraoxonase and arylesterase 1  
PREDICTS: Predictors of Risk for Elevated Flares, Damage Progression and Increased Cardiovascular Disease in Patients with SLE  
PROCAM: Prospective Cardiovascular Münster Study risk calculator  
PWV: Pulse wave velocity  
QAS: quality arterial stiffness  
QRISK3: QRESEARCH risk estimator, version 3  
SCORE: Systematic Coronary Risk Evaluation  
SLAQ: Systemic Lupus Activity Questionnaire  
SLEDAI: Systemic Lupus Erythematosus Disease Activity Index  
SLICC/ACR-DI: Systemic Lupus International Collaborating Clinics/American College of Rheumatology-Damage index  
TG/HDL-C: Serum levels of triglyceride/ high-density lipoprotein cholesterol ratio.  
TNF: tumor necrosis factor  
TRAIL: TNF-related apoptosis-inducing ligand

**Table S1:** Characteristics of individual evidence sources related to obesity.

| Source                        | Year of publication | Country | Setting                                    | Type of study reported by the authors | Time frame | Number of participants | Percentage of women | Obesity assessment                                                                         | Obesity definition                 | Burden measures                                                                                             |
|-------------------------------|---------------------|---------|--------------------------------------------|---------------------------------------|------------|------------------------|---------------------|--------------------------------------------------------------------------------------------|------------------------------------|-------------------------------------------------------------------------------------------------------------|
| Pesqueda-Cendejas K et al[39] | 2022                | Mexico  | Specialized hospital clinic                | Cross-sectional                       | 3 years    | 176                    | 100                 | BMI<br>Waist-hip ratio<br>Waist-height ratio<br>Fat mass                                   | World Health Organization criteria | hs-CRP                                                                                                      |
| Sola Rodríguez S et al[30]    | 2021                | Spain   | Specialized hospital clinic                | Cross-sectional                       | 5 months   | 77                     | 100                 | BMI<br>Waist circumference<br>Body fat percentage<br>Waist-height ratio<br>Waist-hip ratio | N/A                                | hs-CRP and IL-6<br>Leptin                                                                                   |
| Gergianaki I et al [69]       | 2021                | Greece  | Population-based registries                | Cohort                                | 44 month   | 399                    | 91.2                | BMI                                                                                        | World Health Organization criteria | BILAG                                                                                                       |
| Shaaban A et al[37]           | 2021                | Egypt   | Specialized hospital clinic                | Cross sectional                       | N/S        | 30                     | 76.7                | BMI<br>Waist circumference<br>waist-to-hip ratio                                           | N/S                                | cIMT                                                                                                        |
| Tsyhanyk L et al[76]          | 2021                | Ukraine | Specialized hospital clinic                | N/S                                   | N/S        | 123                    | 100                 | BMI                                                                                        | N/S                                | BMD                                                                                                         |
| Sola-Rodriguez S et al[31]    | 2021                | Spain   | Specialized hospital clinic (multicentric) | Cross-sectional                       | 5 month    | 77                     | 100                 | BMI                                                                                        | N/S                                | Clustered cardiometabolic risk: Systolic blood pressure, fasting glucose, TG, HOMA-IR, TC/HDL-c, and hs-CRP |

|                            |      |          |                                            |                    |           |      |      |                                                                     |                                    |                                                                                                                                                                 |
|----------------------------|------|----------|--------------------------------------------|--------------------|-----------|------|------|---------------------------------------------------------------------|------------------------------------|-----------------------------------------------------------------------------------------------------------------------------------------------------------------|
| Borg A et al[28]           | 2021 | Sweden   | Specialized hospital clinic (Multicentric) | Clinical trials    | 13 months | 1684 | 94.1 | BMI                                                                 | World Health Organization criteria | HRQoL-SF-36<br>FACIT-F                                                                                                                                          |
| Pedrosa T et al[77]        | 2021 | Brazil   | Specialized hospital clinic                | Cross-sectional    | N/S       | 108  | 91.6 | BMI                                                                 | World Health Organization criteria | Risk of HCQ toxicity                                                                                                                                            |
| Chanloung W et al[67]      | 2021 | Thailand | Specialized hospital clinic                | Cross-sectional    | 2 years   | 132  | 87   | BMI                                                                 | BMI >25 kg/m2                      | APS Criteria Manifestations                                                                                                                                     |
| Campos-Lopez B et al[55]   | 2021 | Mexico   | Specialized hospital clinic                | Cross-sectional    | 2 years   | 158  | 100  | BMI<br>Waist circumference<br>Waist-height ratio<br>Waist-hip ratio | World Health Organization criteria | SLICC-ACR DI<br>Mex-SLEDAI<br>hs-CRP<br>Glucose<br>Castelli index<br>Kannel index<br>TG/HDL-C ratio<br>High TG/ low HDL-C<br>Cardiometabolic index<br>LAP score |
| Gomez A et al[79]          | 2021 | Sweden   | Specialized hospital clinic (Multicentric) | Cross-sectional    | 13 months | 1684 | 94.1 | BMI                                                                 | World Health Organization criteria | HRQoL-SF-36<br>EQ-5D<br>FACIT-F<br>Cumulative prednisolone dosage<br>Intravenous cyclophosphamide, among others<br>Comorbidities prevalence                     |
| Dias-Santos A et al[74]    | 2020 | Portugal | Specialized hospital clinic                | Cross-sectional    | 1 year    | 68   | 85.2 | BMI                                                                 | N/S                                | Retinal neurodegeneration                                                                                                                                       |
| Sanchez-Perez H et al [64] | 2020 | Spain    | Specialized hospital clinic (Multicentric) | Cross-sectional    | N/S       | 195  | 95   | BMI<br>Waist circumference                                          | N/S                                | CEC<br>cIMT                                                                                                                                                     |
| Ajeganova S et al[65]      | 2020 | Sweden   | Specialized hospital clinic                | Prospective cohort | 7 years   | 77   | 90   | BMI<br>Waist circumference                                          | World Health Organization criteria | cIMT                                                                                                                                                            |

|                                |      |                   |                                            |                      |          |     |      |                                                  |                                          |                                                                                                                                                 |
|--------------------------------|------|-------------------|--------------------------------------------|----------------------|----------|-----|------|--------------------------------------------------|------------------------------------------|-------------------------------------------------------------------------------------------------------------------------------------------------|
| Apostolopoulos D et al[78]     | 2020 | Australia         | Specialized hospital clinic                | Cross-sectional      | 15 years | 116 | 87.9 | BMI                                              | World Health Organization criteria       | SLICC/ACR-DI<br>SLEDAI-2K<br>Resistin<br>Lipocalin-2<br>TNF<br>MCP-1<br>IL-6                                                                    |
| Kang JH et al[80]              | 2020 | Republic of Korea | Specialized hospital clinic (multicentric) | Prospective cohort   | 3 years  | 393 | N/S  | BMI<br>Waist circumference<br>Waist to hip ratio | World Health Organization criteria       | Clinical manifestations prevalence<br>SLEDAI-2K<br>PGA<br>SLICC/ACR-DI<br>HRQoL-SF-36<br>Comorbid depression<br>Newly developed lupus nephritis |
| Przywara-Chowaniec B et al[49] | 2020 | Poland            | Specialized hospital clinic                | N/S                  | 45 month | 38  | 89.4 | BMI                                              | N/S                                      | SLEDAI                                                                                                                                          |
| Pocovi-Gerardino G[63]         | 2020 | Spain             | Specialized hospital clinic (Multicentric) | Cross-sectional      | 22 month | 139 | 90.6 | BMI                                              | N/S                                      | hs-CRP<br>Homocysteine                                                                                                                          |
| Alian S et al[72]              | 2019 | Egypt             | Specialized hospital clinic                | Retrospective cohort | N/S      | 152 | 88.2 | BMI                                              | N/S                                      | Mortality                                                                                                                                       |
| Behiry ME et al[73]            | 2019 | <i>Egypt</i>      | Specialized hospital clinic                | Cross-sectional      | 2 month  | 65  | 100  | BMI                                              | World Health Organization criteria       | SLEDAI                                                                                                                                          |
| Rodriguez M[42]                | 2019 | Spain             | specialized hospital clinic                | Cross-sectional      | N/S      | 78  | 92.3 | BMI                                              | World Health Organization (WHO) criteria | cIMT                                                                                                                                            |
| Mellor-Pita S et al[46]        | 2019 | Spain             | Specialized hospital clinic                | Cross-sectional      | N/D      | 47  | 100  | BMI<br>Waist circumference                       | N/S                                      | Vitamin D levels                                                                                                                                |

|                              |      |        |                                            |                 |          |     |     |                                                                                                                                                   |                                    |                                                                                                                                                                                                                                                          |
|------------------------------|------|--------|--------------------------------------------|-----------------|----------|-----|-----|---------------------------------------------------------------------------------------------------------------------------------------------------|------------------------------------|----------------------------------------------------------------------------------------------------------------------------------------------------------------------------------------------------------------------------------------------------------|
| Quevedo-Abeledo JC et al[47] | 2019 | Spain  | Specialized hospital clinic (Multicentric) | Cross-sectional | N/S      | 276 | 95  | BMI<br>Waist circumference                                                                                                                        | N/S                                | cIMT                                                                                                                                                                                                                                                     |
| Li Z et al[20]               | 2019 | China  | Specialized hospital clinic                | Cross-sectional | 3 years  | 98  | 100 | BMI<br>Fat mas<br>Bone mineral content<br>Visceral<br>Adipose Tissue volume<br>Visceral<br>Adipose Tissue mass<br>Fat mass index<br>Fat-free mass | N/S                                | SLEDAI-2K<br>SLICC/ACR-DI<br>Lipid profile<br>C3/C4 serum levels<br>hsCR<br>Serum antibody level (ANA, anti-dsDNA, Anti-Smith, anti-Ro, Anti-La)<br>Current or cumulative glucocorticoid dose<br>Lipid profile<br>Serum creatinin<br>Uric acid<br>hs-CRP |
| Fernandez-Garces M et al[50] | 2019 | Spain  | Specialized hospital clinic (Multicentric) | Cross-sectiona  | 10 years | 335 | 100 | BMI<br>Waist circumference                                                                                                                        | World Health Organization criteria | CVD                                                                                                                                                                                                                                                      |
| Meza-Meza MR[81]             | 2019 | Mexico | Specialized hospital clinic                | Cross-sectional | 2 years  | 130 | 100 | BMI                                                                                                                                               | World Health Organization criteria | Mex-SLEDAI<br>Glucose<br>Lipid profile<br>Blood pressure                                                                                                                                                                                                 |
| Sola-Rodriguez S[29]         | 2019 | Spain  | Specialized hospital clinic (Multicentric) | Cross-sectional | 5 months | 77  | 100 | BMI<br>Waist circumference<br>Body fat percentage<br>Waist-height ratio<br>Waist-hip ratio                                                        | N/S                                | Siconolfi step test<br>6 min walk test<br>handgrip strength test<br>30 s chair stand<br>back-scratch test                                                                                                                                                |

|                           |      |        |                                            |                             |          |     |      |                                |                                                                                   |                                                                         |
|---------------------------|------|--------|--------------------------------------------|-----------------------------|----------|-----|------|--------------------------------|-----------------------------------------------------------------------------------|-------------------------------------------------------------------------|
| Teh P et al[15]           | 2019 | USA    | Specialized hospital clinic (Multicentric) | Population-based registries | 3 years  | 137 | 92   | BMI                            | World Health Organization criteria                                                | SLEDAI<br>Current steroid use<br>Clinical manifestations prevalence (%) |
| Patterson SL et al[19]    | 2019 | USA    | Clinical- and community-based sources      | Cross-sectional             | N/S      | 138 | 100  | BMI<br>Fat mass index          | Fat mass index $\geq 13$ kg/m <sup>2</sup> and World Health Organization criteria | SLAQ<br>CES-D<br>SF-36 Pain Subscale<br>SF-36 Vitality Subscale         |
| Yang XF et al [43]        | 2018 | China  | Specialized hospital clinic                | Cross-sectional             | 10 month | 90  | 100  | BMI                            | N/S                                                                               | baPWV                                                                   |
| Baragetti A et al[21]     | 2018 | Italy  | Specialized hospital clinic                | Prospective cohort          | 5 years  | 40  | 90   | BMI<br>Waist-hip ratio         | N/S                                                                               | cIMT<br>SLEDAI-2K<br>SLICC/ACR DI<br>PGA                                |
| Seguro LPC et al[75]      | 2018 | Brazil | Specialized hospital clinic                | N/S                         | N/S      | 63  | 100  | BMI<br>Visceral adipose tissue | N/S                                                                               | CRP<br>HDL<br>LDL<br>TC<br>TG<br>Cumulative glucocorticoid dose         |
| Wigren M et al[22]        | 2018 | Sweden | Specialized hospital clinic                | Cohort                      | 9 years  | 470 | 88   | BMI                            | N/S                                                                               | cIMT<br>CVD                                                             |
| Vazquez-Del Mercado M[12] | 2018 | Mexico | Specialized hospital clinic                | N/S                         | 18 month | 67  | 17.9 | BMI<br>Waist circumference     | World Health Organization criteria                                                | QRISK3<br>cIMT<br>PWV<br>cfPWV<br>Artery Distensibility                 |
| Garcia-Carrasco M[45]     | 2018 | Mexico | Specialized hospital clinic                | Cross-sectional             | 18 month | 66  | 100  | BMI<br>Waist circumference     | N/S                                                                               | cIMT                                                                    |
| Hammam N et al[82]        | 2018 | Egypt  | Specialized hospital clinic                | Cross-sectional             | 2 years  | 74  | 87.8 | BMI                            | N/S                                                                               | SLEDAI-2K                                                               |

|                           |      |                 |                                            |                    |         |     |      |                                                  |     |                                  |
|---------------------------|------|-----------------|--------------------------------------------|--------------------|---------|-----|------|--------------------------------------------------|-----|----------------------------------|
|                           |      |                 |                                            |                    |         |     |      | Waist<br>circumference                           |     |                                  |
| Romero-Diaz J et al[3]    | 2018 | Mexico          | Specialized hospital clinic                | N/S                | 7 years | 95  | 0    | BMI<br>Waist<br>circumference                    | N/S | Coronary artery<br>calcium score |
| Tziomalos K et al[33]     | 2017 | Greece          | Specialized hospital clinic                | N/S                | 2 years | 55  | 87.3 | BMI<br>Waist<br>circumference<br>Waist/hip ratio | N/S | PWV<br>ABI                       |
| Sanchez-Perez H et al[38] | 2017 | Spain           | Specialized hospital clinic                | Cross-sectional    | 5 years | 87  | 95   | BMI<br>Waist<br>circumference                    | N/S | HOMA2B%-C-peptide<br>HOMA2-IR    |
| Garcia-Garcia P et al[35] | 2017 | Spain           | Specialized hospital clinic                | Cross-sectional    | N/S     | 61  | 100  | BMI                                              | N/S | Cystatin C                       |
| Mak A et al[83]           | 2017 | Singapore       | Specialized hospital clinic                | Case-control       | N/S     | 71  | 91.6 | BMI                                              | N/S | FMD<br>cIMT                      |
| Tektonidou MG et al [84]  | 2017 | Greece          | Specialized hospital clinic                | N/S                | 2 years | 115 | 92   | BMI                                              | N/S | cIMT                             |
| Tsang M et al [85]        | 2017 | The Netherlands | Specialized hospital clinic (Multicentric) | Prospective cohort | N/D     | 165 | 90.2 | BMI                                              | N/S | SLICC/ACR-DI                     |

**Table S2:** Characteristics of individual evidence sources related to diabetes mellitus.

| Source                       | Year of publication | Country  | Setting                                    | Type of study reported by the authors | Time frame | Number of participants | Percentage of women | Diabetes mellitus definition                                                                                                 | Burden measures                  |
|------------------------------|---------------------|----------|--------------------------------------------|---------------------------------------|------------|------------------------|---------------------|------------------------------------------------------------------------------------------------------------------------------|----------------------------------|
| Chanloun W et al[67]         | 2021                | Thailand | Specialized hospital clinic                | Cross-sectional                       | 2 years    | 132                    | 87                  | NICE Guidelines                                                                                                              | APS Criteria Manifestations      |
| Gergianaki I et al [69]      | 2021                | Greece   | Population-based registry                  | Cohort                                | 44 month   | 399                    | 91.2                | N/S                                                                                                                          | BILAG                            |
| Gamal SM et al[71]           | 2021                | Egypt    | Specialized hospital clinic (multicenter)  | Retrospective study                   | 3 years    | 565                    | 92.5                | N/S                                                                                                                          | Lupus vasculitis                 |
| Sanchez-Perez H[64]          | 2020                | Spain    | Specialized hospital clinic (Multicentric) | Cross-sectional                       | N/S        | 195                    | 95                  | N/S                                                                                                                          | CEC cIMT                         |
| Ammar W et al[36]            | 2020                | Egypt    | Specialized hospital clinic                | Cross-sectional                       | N/S        | 50                     | 94                  | N/S                                                                                                                          | AoS<br>QAS<br>FMD<br>cIMT<br>PWV |
| Ajeganova S et al[65]        | 2020                | Sweden   | Specialized hospital clinic                | Prospective cohort                    | 7 years    | 77                     | 90                  | History of diabetes mellitus<br>prescription of antidiabetic drugs                                                           | cIMT                             |
| Quevedo-Abeledo JC et al[47] | 2019                | Spain    | Specialized hospital clinic (Multicentric) | Cross-sectional                       | N/S        | 276                    | 95                  | N/S                                                                                                                          | cIMT                             |
| Fernandez-Garcés M et al[50] | 2019                | Spain    | Specialized hospital clinic (Multicentric) | Cross-sectiona                        | 10 years   | 335                    | 100                 | Previous diagnosis or $\geq 2$ measurements of fasting serum glucose $\geq 126$ mg/dL and/or use of antidiabetic medications | CVD                              |
| Mellor-Pita S et al[46]      | 2019                | Spain    | Specialized hospital clinic                | Cross-sectional                       | N/S        | 47                     | 100                 | Patient was treated with oral agents                                                                                         | Vitamin D levels                 |



|                             |      |                  |                                    |                      |          |      |      |                                                                                                                         |                                              |
|-----------------------------|------|------------------|------------------------------------|----------------------|----------|------|------|-------------------------------------------------------------------------------------------------------------------------|----------------------------------------------|
|                             |      |                  |                                    |                      |          |      |      | or insulin or if fasting glucose was $\geq 126$ mg/dl                                                                   |                                              |
| Petri MA et al[48]          | 2019 | USA              | Specialized hospital clinic        | Cohort               | 1 year   | 1721 | 92   | N/S                                                                                                                     | CVD                                          |
| Baragetti A et al[21]       | 2018 | Italy            | Specialized hospital clinic        | Prospective cohort   | 5 years  | 40   | 90   | ADA criteria 2016                                                                                                       | cIMT<br>SLEDAI-2K<br>SLICC/ACR-DI<br>PGA     |
| Jordan-Gonzalez P et al[66] | 2018 | Puerto Rico/ USA | Hospitalized patients              | Retrospective study  | 8 years  | 129  | 89.9 | N/S                                                                                                                     | Risk of infections                           |
| Jiang MY et al[68]          | 2018 | Taiwan           | National population-based registry | Retrospective cohort | 12 years | 1317 | 91   | At least 1 time of diagnosis of Diabetes Mellitus, or a prescription for anti-diabetic medication in the registry data. | ESRD incidence survival since ESRD diagnosis |
| Romero-Diaz J et al[3]      | 2018 | Mexico           | Specialized hospital clinic        | N/S                  | 7 years  | 95   | 0    | N/S                                                                                                                     | Coronary artery calcium score                |
| Wigren M et al[22]          | 2018 | Sweden           | Specialized hospital clinic        | Cohort               | 9 years  | 470  | 88   | N/S                                                                                                                     | CVD<br>cIMT                                  |
| Vazquez-Del Mercado M[12]   | 2018 | Mexico           | Specialized hospital clinic        | N/S                  | 18 month | 67   | 17.9 | N/S                                                                                                                     | QRISK3                                       |
| Garcia-Garcia P et al[35]   | 2017 | Spain            | Specialized hospital clinic        | Cross-sectional      | N/S      | 61   | 100  | Patient was treated with oral agents or insulin or if fasting glucose was $\geq 126$ mg/dl                              | Cystatin C                                   |
| Falasinu T et al[70]        | 2017 | USA              | Population-based registry          | Cross-sectional      | 1 year   | 2036 | 86.2 | ICD-10 as cause of death                                                                                                | Mortality                                    |

**Table S3:** Characteristics of individual evidence sources related to cardiovascular risk.

| Source                        | Year of publication | Country | Setting                                    | Type of study reported by the authors | Time frame | Number of participants | Percentage of women | Cardiovascular risk assessment                                                              | Percentage of patients with cardiovascular risk >10% or with atherosclerotic plaques | Associated factors                                                                                                           |
|-------------------------------|---------------------|---------|--------------------------------------------|---------------------------------------|------------|------------------------|---------------------|---------------------------------------------------------------------------------------------|--------------------------------------------------------------------------------------|------------------------------------------------------------------------------------------------------------------------------|
| Zhu L et al[26]               | 2022                | USA     | Specialized hospital clinic (Multicentric) | Prospective cohort                    | 15 years   | 366                    | 97                  | QRISK3<br>FRS<br>mFRS<br>PREDICTS<br>ASCVD-ACC/AHA                                          | N/S                                                                                  | N/S                                                                                                                          |
| Pesqueda-Cendejas K et al[39] | 2022                | Mexico  | Specialized hospital clinic                | Cross-sectional                       | 3 years    | 176                    | 100                 | Castelli index<br>Kannel index<br>TG/HDL-C ratio<br>Cardiometaabolic index<br>LAP<br>hs-CRP | N/S                                                                                  | Mex-SLEDAI                                                                                                                   |
| Shaaban A et al[37]           | 2021                | Egypt   | Specialized hospital clinic                | Cross sectional                       | N/S        | 30                     | 76.7                | cIMT                                                                                        | N/S                                                                                  | N/S                                                                                                                          |
| Patino-Trives AM et al[53]    | 2021                | Spain   | Specialized hospital clinic                | Cross-sectional                       | 2 years    | 80                     | 90                  | cIMT<br>Plasma atherogenic index<br>ApoB/ApoA ratio                                         | N/S                                                                                  | Positivity, titers and persistence of anti-dsDNA. altered transcriptomic signatures in monocytes<br>NETosis-derived products |
| Weber BN et al[54]            | 2021                | USA     | Specialized hospital clinic                | Prospective cohort                    | 12 years   | 42                     | 97                  | MFR<br>Coronary artery calcium score                                                        | N/S                                                                                  | Age<br>Disease duration                                                                                                      |
| Sivakumaran J et al[14]       | 2021                | Canada  | Specialized hospital clinic                | Retrospective cohort                  | 47 years   | 1887                   | 88                  | QRISK2<br>QRISK3<br>FRS<br>mFRS                                                             | QRISK2: 13<br>QRISK3: 20<br>FRS: 14.5<br>mFRS:17.5                                   | N/S                                                                                                                          |

|                              |      |            |                                            |                 |          |      |      |                                                                                                                                                                                   |                                        |                                                           |
|------------------------------|------|------------|--------------------------------------------|-----------------|----------|------|------|-----------------------------------------------------------------------------------------------------------------------------------------------------------------------------------|----------------------------------------|-----------------------------------------------------------|
|                              |      |            |                                            |                 |          |      |      | SLE Cardiovascular risk equation                                                                                                                                                  | SLE Cardiovascular risk equation: 48.5 |                                                           |
| Sola-Rodriguez S et al[31]   | 2021 | Spain      | Specialized hospital clinic (multicentric) | Cross-sectional | 5 month  | 77   | 100  | Clustered cardiometabolic risk: Systolic blood pressure, fasting glucose, TG, HOMA-IR, TC/HDL-c, and hs-CRP                                                                       | N/S                                    | Relative Handgrip Strength BMI                            |
| Campos-Lopez B et al[55]     | 2021 | Mexico     | Specialized hospital clinic                | Cross-sectional | 2 years  | 158  | 100  | Glucose<br>Castelli index<br>Kannel index<br>tG/HDL-C ratio,<br>High TG/ low HDL-C<br>Cardiometabolic index<br>LAP score<br>hs-CRP<br>Waist to height ratio<br>Waist to hip ratio | N/S                                    | Disease duration<br>Mex-SLEDAI                            |
| Chew C et al[18]             | 2021 | Multi-site | Specialized hospital clinic (multicentric) | Cross-sectional | 13 years | 1163 | 88.9 | HOMA-IR<br>Fasting insulin<br>Fasting glucose<br>HDL-C<br>TG<br>TC<br>Diastolic Blood Pressure<br>Systolic Blood pressure<br>Waist circumference                                  | N/D                                    | Vitamin D                                                 |
| Croca SC et al[56]           | 2021 | UK         | Specialized hospital clinic                | N/S             | N/S      | 100  | 95   | Femoral and carotid IMT                                                                                                                                                           | 36                                     | TG<br>Prednisolone therapy<br>Persistent disease activity |
| Correa-Rodriguez M et al[57] | 2021 | Spain      | Specialized hospital clinic (Multicentric) | Cross-sectional | N/S      | 264  | 89.4 | Risk factors: Smoking, Hypertension, Dyslipidemia, Diabetes, Obesity<br>ABI                                                                                                       | N/S                                    | N/S                                                       |

|                                       |      |           |                                                     |                       |             |     |      |                                                                                                                           |                                                                       |                                                                |
|---------------------------------------|------|-----------|-----------------------------------------------------|-----------------------|-------------|-----|------|---------------------------------------------------------------------------------------------------------------------------|-----------------------------------------------------------------------|----------------------------------------------------------------|
| Quevedo-<br>Abeledo JC et<br>al[61]   | 2021 | Spain     | Specialized<br>hospital<br>clinic<br>(Multicentric) | Cross-<br>sectional   | N/S         | 195 | 95   | Atherogenic Index<br>CEC<br>Apo B:Apo A ratio                                                                             | N/S                                                                   | N/S                                                            |
| Pocovi-<br>Gerardino G, et<br>al[62]  | 2021 | Spain     | Specialized<br>hospital<br>clinic<br>(Multicentric) | Cross-<br>sectional   | N/S         | 280 | 90.4 | hs-CRP<br>homocysteine<br>Lipid profile<br>BMI<br>Fat mass percentage<br>ABI<br>Type II diabetes<br>Arterial hypertension | N/S                                                                   | Med Diet adherence                                             |
| Di Battista M et<br>al[34]            | 2020 | Italy     | Specialized<br>hospital<br>clinic                   | Cohort                | 4<br>month  | 123 | 90.2 | FRS<br>QRISK3<br>ASCVD-ACC/AHA                                                                                            | FRS: 23.6<br>QRISK3: 35.8<br>ASCVD-<br>ACC/AHA:<br>13.8               | N/S                                                            |
| Ammar W et<br>al[36]                  | 2020 | Egypt     | Specialized<br>hospital<br>clinic                   | Cross-<br>sectional   | N/S         | 50  | 94   | AoS<br>QAS<br>FMD<br>cIMT<br>PWV                                                                                          | N/S                                                                   | Disease duration<br>Arterial hypertension                      |
| Przywara-<br>Chowaniec B et<br>al[49] | 2020 | Poland    | Specialized<br>hospital<br>clinic                   | N/S                   | 45<br>month | 38  | 89.4 | cIMT<br>QRISK3                                                                                                            | N/S                                                                   | Disease duration                                               |
| Masson W et<br>al[51]                 | 2020 | Argentina | Specialized<br>hospital<br>clinic<br>(Multicentric) | Cross-<br>sectional   | 18<br>years | 110 | N/S  | QRISK-3<br>mFRS                                                                                                           | QRISK-3: 42.1<br>mFRS:54.8                                            | N/S                                                            |
| Salveti M[52]                         | 2020 | Italy     | Specialized<br>hospital<br>clinic                   | N/S                   | 10<br>month | 33  | 100  | FRS<br>PWV<br>cIMT                                                                                                        | 42                                                                    | Weekly steroids dose                                           |
| Drosos GC et<br>al[13]                | 2020 | Greece    | Specialized<br>hospital<br>clinic                   | Prospective<br>cohort | N/S         | 210 | 93.3 | SCORE<br>FRS<br>ASCVD-ACA/AHA<br>PROCAM<br>mSCORE<br>mFRS                                                                 | SCORE<br>: 7.6<br>mSCORE:9.0<br>FRS: 4.1<br>mFRS: 17.0<br>QRISK3:32.2 | Age<br>Pack-years smoking<br>Cumulative<br>corticosteroid dose |

|                        |      |        |                                            |                 |          |     |      |                                                                                                |                                                                                                                                                                               |                                                                                |
|------------------------|------|--------|--------------------------------------------|-----------------|----------|-----|------|------------------------------------------------------------------------------------------------|-------------------------------------------------------------------------------------------------------------------------------------------------------------------------------|--------------------------------------------------------------------------------|
|                        |      |        |                                            |                 |          |     |      | QRISK3<br>cIMT                                                                                 | ASCVD: 13.2<br>PROCAM:<br>1.9%<br>Carotid*<br>plaques were<br>detected in<br>19.5%, femoral<br>plaques in<br>14.3%<br>and plaques at<br>both sites in<br>10.6% of<br>patients |                                                                                |
| Bortoluzzi A et al[25] | 2020 | Italy  | Specialized hospital clinic (Multicentric) | Cohort          | 2 years  | 20  | 100  | cIMT                                                                                           | N/S                                                                                                                                                                           | N/S                                                                            |
| Casey KA et al[24]     | 2020 | USA    | Specialized hospital clinic (Multicentric) | Clinical trial  | 2 years  | 305 | 93.4 | CEC<br>Lipid profile<br>GlycA<br>HOMA-IR<br>NET formation                                      | N/S                                                                                                                                                                           | N/S                                                                            |
| Legge A[32]            | 2020 | Canada | Specialized hospital clinic                | Cross-sectional | 12 month | 100 | 92   | ASCVD-ACC/AHA<br>TC/HDL ratio,<br>TG<br>Blood pressure<br>BMI                                  | 20                                                                                                                                                                            | Moderate-vigorous physical activity (accelerometry)                            |
| Pocovi-Gerardino G[63] | 2020 | Spain  | Specialized hospital clinic (multicentric) | Cross-sectional | 22 month | 139 | 90.6 | Risk factors: Obesity,<br>Diabetes mellitus,<br>Arterial hypertension,<br>Lipid profile<br>ABI | N/S                                                                                                                                                                           | hs-CRP<br>Homocysteine                                                         |
| Lopez P et al[23]      | 2020 | Spain  | Specialized hospital clinic                | Cohort          | N/S      | 109 | 94   | cIMT                                                                                           | 33.9                                                                                                                                                                          | CD16_ low-density granulocytes and monocyte-to-high density lipoprotein ratios |
| Sanchez-Perez H[64]    | 2020 | Spain  | Specialized hospital                       | Cross-sectional | N/S      | 195 | 95   | CEC<br>cIMT                                                                                    | 34                                                                                                                                                                            | N/S                                                                            |

|                              |      |        |                                               |                    |         |      |      |                                                                                                                                                                                                                                                             |      |                                                                                                  |
|------------------------------|------|--------|-----------------------------------------------|--------------------|---------|------|------|-------------------------------------------------------------------------------------------------------------------------------------------------------------------------------------------------------------------------------------------------------------|------|--------------------------------------------------------------------------------------------------|
|                              |      |        | clinic<br>(Multicentric)                      |                    |         |      |      | Apo B:Apo A ratio<br>Atherogenic<br>Index                                                                                                                                                                                                                   |      |                                                                                                  |
| Ajeganova S et al[65]        | 2020 | Sweden | Specialized hospital clinic                   | Prospective cohort | 7 years | 77   | 90   | cIMT                                                                                                                                                                                                                                                        | 39   | Lupus nephritis<br>Corticosteroids use<br>Arterial hypertension<br>TC/HDL ratio<br>LDL/HDL ratio |
| Rodriguez M et al[42]        | 2019 | Spain  | Specialized hospital clinic                   | Cross-sectional    | N/D     | 78   | 92.3 | cIMT                                                                                                                                                                                                                                                        | 12.8 | IDL and LDL net charge<br>Age                                                                    |
| Mellor-Pita S et al[46]      | 2019 | Spain  | Specialized hospital clinic                   | Cross-sectional    | N/S     | 47   | 100  | PWV<br>cIMT<br>Risk factors prevalence:<br>arterial hypertension,<br>diabetes mellitus,hyperlipidemia,<br>family history of cardiovascular,<br>metabolic syndrome<br>hs-CRP<br>Homocysteine<br>Uric acid<br>Creatinine clearance<br>Microalbumin/creatinine | 48   | Vitamin D levels                                                                                 |
| Quevedo-Abeledo JC et al[47] | 2019 | Spain  | Specialized hospital clinic<br>(Multicentric) | Cross-sectional    | N/S     | 276  | 95   | SCORE<br>cIMT                                                                                                                                                                                                                                               | 36   | Disease duration<br>SLICC/DI                                                                     |
| Petri MA et al[48]           | 2019 | USA    | Specialized hospital clinic                   | Cohort             | 1 year  | 1721 | 92   | ASCVD-ACC/AHA<br>FRS                                                                                                                                                                                                                                        | N/S  | N/S                                                                                              |
| Li Z et al[20]               | 2019 | China  | Specialized hospital clinic                   | Cross-sectional    | 3 years | 98   | 100  | Glucose<br>Creatinine<br>Uric acid<br>hs-CRP<br>TG<br>TC<br>HDL-C                                                                                                                                                                                           | N/S  | Visceral adipose tissue                                                                          |

|                              |      |        |                                                     |                 |          |     |     |                                                                                                                                                                         |      |                                                    |
|------------------------------|------|--------|-----------------------------------------------------|-----------------|----------|-----|-----|-------------------------------------------------------------------------------------------------------------------------------------------------------------------------|------|----------------------------------------------------|
|                              |      |        |                                                     |                 |          |     |     | LDL-C                                                                                                                                                                   |      |                                                    |
| Fernandez-Garces M et al[50] | 2019 | Spain  | Specialized hospital clinic (Multicentric)          | Cross-sectional | 10 years | 335 | 100 | cIMT<br>ABI<br>BMD<br>Homocysteine<br>hs-CRP<br>Arterial hypertension<br>Smoking<br>Dyslipidemia<br>Sedentary lifestyle<br>Early menopause<br>Diabetes<br>Lipid profile | 20.7 | CVD                                                |
| Chandrashekara S et al[59]   | 2019 | India  | Specialized hospital clinic                         | Cross-sectional | 7 month  | 9   | 100 | Atherogenic index of plasma                                                                                                                                             | N/S  | Uric acid levels                                   |
| Rashad NM et al[60]          | 2019 | Egypt  | Specialized hospital clinic                         | Case-control    | N/S      | 140 | 100 | cIMT                                                                                                                                                                    | N/S  | Resistin +299G/A gene polymorphisms                |
| Jafri K et al[27]            | 2018 | USA    | Clinical and community-based sources (Multicentric) | Cross-sectional | N/S      | 157 | 93  | FRS<br>mFRS<br>ASCVD-ACC/AHA                                                                                                                                            | N/S  | N/S                                                |
| Yang XF et al [43]           | 2018 | China  | Specialized hospital clinic                         | Cross-sectional | 10 month | 90  | 100 | ABI<br>PWV                                                                                                                                                              | N/S  | Arterial hypertension<br>NLR<br>SLEDAI             |
| Giannelou Met al [44]        | 2018 | Greece | Specialized hospital clinic                         | Cross-sectional | N/S      | 150 | 94  | cIMT                                                                                                                                                                    | 55.3 | Hyperhomocysteinemia<br>MTHFR 677TT genotype       |
| Wigren M et al[22]           | 2018 | Sweden | Specialized hospital clinic                         | Cohort          | 9 years  | 470 | 88  | cIMT                                                                                                                                                                    | 20.4 | Fas<br>TNF receptor 1<br>TRAIL receptor 2<br>MMP-7 |
| Garcia-Carrasco M[45]        | 2018 | Mexico | Specialized hospital clinic                         | Cross-sectional | 18 month | 66  | 100 | cIMT<br>mFRS                                                                                                                                                            | 59   | Levels of Treg cells                               |

|                           |      |           |                             |                    |          |     |      |                                                            |               |                                                                                |
|---------------------------|------|-----------|-----------------------------|--------------------|----------|-----|------|------------------------------------------------------------|---------------|--------------------------------------------------------------------------------|
| Vazquez-Del Mercado M[12] | 2018 | Mexico    | Specialized hospital clinic | N/S                | 18 month | 67  | 17.9 | QRISK 3<br>cIMT<br>PWV<br>cfPWV<br>Arterial distensibility | QRISK3 : 15.2 | Age<br>BMI                                                                     |
| Baragetti A et al[21]     | 2018 | Italy     | Specialized hospital clinic | Prospective cohort | 5 years  | 40  | 90   | cIMT<br>FRS<br>SLE Cardiovascular Risk Equation            | 32            | Levels of CD4 <sup>+</sup> CCR5 <sup>+</sup> T cells<br>SLEDAI                 |
| Fox H et al[58]           | 2018 | Germany   | specialized hospital clinic | Prospective study  | 1 year   | 35  | 74.5 | ABI<br>cIMT                                                | N/S           | N/S                                                                            |
| Tziomalos K et al[33]     | 2017 | Greece    | Specialized hospital clinic | N/S                | 2 years  | 55  | 87.3 | ABI<br>PWV<br>AIx                                          | N/S           | N/S                                                                            |
| Garcia-Garcia P et al[35] | 2017 | Spain     | Specialized hospital clinic | Cross-sectional    | N/S      | 61  | 100  | PWV<br>cIMT                                                | N/S           | Arterial hypertension<br>Metabolic syndrome<br>Hypertriglyceridemia<br>Smoking |
| Sanchez-Perez H et al[38] | 2017 | Spain     | Specialized hospital clinic | Cross-sectional    | 5 years  | 87  | 95   | cIMT                                                       | 20%           | N/S                                                                            |
| Cypiene A et al[40]       | 2017 | Lithuania | Specialized hospital clinic | Cross sectional    | 8 years  | 93  | 92.9 | PWV<br>AIx<br>FMD                                          | N/S           | MBP                                                                            |
| Lopez P et al[41]         | 2017 | Spain     | Specialized hospital clinic | Cohort             | N/D      | 118 | 94.9 | cIMT                                                       | 32            | anti-PON1 antibodies<br>anti-HDL antibodies                                    |
